# Supplementary material
Source: Elsevier journal article supplement (https://www.sciencedirect.com/science/article/pii/S0214460320301066)
Supplement: mmc1 [file S0214460320301066:mmc1.doc]

ANEXO I

**Cuestionario del Delphi de habla catalana**

Puede consultarse directamente en

<https://docs.google.com/document/d/1uU1T2QI4TecVXOxm6H2Yc0mX7KYPJFziPX3F92NgSU8/edit>

En el documento, además de las cuestiones, se incluyen la presentación y el objetivo del estudio, el modo de responder en las valoraciones y la realización de los comentarios. Se incluyen también, como notas al pie, definiciones, acotaciones y ejemplos de ayuda.

1. **QÜESTIONS PRÈVIES**

***Beneficis del consens en la nosologia i la terminologia en ús***

1.1 *Arribar a un consens, amb criteris comuns, sobre la* ***nosologia*** *i la* ***terminologia*** *dels Trastorns del llenguatge (TL) seria molt beneficiós, tant per als infants i joves que els pateixen, com per a les famílies, els professionals i els investigadors*

***Existència del Trastorn del Llenguatge com a tal***

*1.2 El terme de* ***Trastorn del Llenguatge*** *(TL), entès de manera genèrica com fa el DSM-V, és “una* ***dificultat greu****, que* ***persisteix*** *durant la infància, i que* ***perjudica l’adaptació social i el seguiment escolar****”. La qüestió que es planteja és la de si aquesta caracterització és prou clara i precisa per a ser emprada com a entitat independent en els diferents* ***contextos clínics i escolars i de recerca*** *per tal poder considerar que és una* ***entitat nosològica independent.***

*1.3 Els criteris mencionats en l’anterior qüestió (1.2) són suficients per identificar tots els infants amb dificultats greus de l’aprenentatge del llenguatge, fer-los-hi un diagnòstic (o valoració), per tal que pugui accedir a la corresponent ajuda de necessitats específiques.*

*1.4 El procés d’identificació dels símptomes i el resultat diagnòstic que reben* ***usualment*** *els infants amb TL en el meu entorn és satisfactori*

***Diversitat terminològica***

*1.5 Els termes per referir-se als TDL actualment en ús són diversos. Valora’n cada un i comenta’l:*

- Trastorn específic del llenguatge (TEL)

- Trastorn del llenguatge (TL)

- Trastorn del Desenvolupament del Llenguatge (TdDL)

- Trastorn primari del llenguatge (TPL)

- Disfàsia

- Altres:

*1.6 Les valoracions i comentaris fets dels termes anteriors (1.5) són* ***compartits*** *per la majoria de professionals del meu entorn*

**2. NOSOLOGIA**

***Condicions per clarificar la nosologia***

*2.1 El* ***Trastorn del Llenguatge*** *passa massa desapercebut i hauria de ser identificat entorn dels 3 anys.*

*2.2 La informació i les eines que es tenen a l’abast per valorar, identificar i tractar els Trastorns del Llenguatge (TL) són suficients per fonamentar i guiar la intervenció logopèdica.*

***Diferències en les dificultats per identificar els trastorns i els retards del llenguatge***

*2.3 El processament del llenguatge és complex i, al menys fins els 4 anys d’edat, poden haver-hi dificultats de desenvolupament associades, que dificulten la distinció entre la simptomatologia biomèdica i la simptomatologia funcional. Caldria avaluar totes les competències de suport per tal que les dificultats específiques del llenguatge es posin de relleu entre les altres.*

*2.4 En la diagnosi dels problemes del llenguatge als 4 anys és difícil distingir entre els problemes* ***funcionals*** *i* ***estructurals****. Per això, és recomanable un* ***seguiment temporal*** *abans de decidir un diagnòstic.*

*2.5 El* ***Retard del Llenguatge (i no el Trastorn)*** *es caracteritza per la presència d’habilitats amb mancances notables de nivell. Ara bé, en el moment d’avaluació, no es considera probable una repercussió amb dificultats funcionals greus i persistents en l’adaptació social i escolar.*

***Nosologia específica per clarificar els trets constitutius del Trastorn del Llenguatge (TL)***

*2.6 El T****rastorn del Llenguatge*** *és considerat com a* ***funcionalment i estructuralment molt greu***

*2.7 Un* ***Trastorn******del Llenguatge*** *es caracteritza per ser* ***persistent*** *i* ***consolidat****, malgrat es vagi assolint una certa millora social i fins i tot escolar.*

*2.8 Les dificultats en el Trastorn del Llenguatge són prou greus com per posar en risc, dins les pròpies circumstàncies de l’infant, una adaptació personal, social i escolar acceptable*

***Precisions i limitacions en els diagnòstics***

*2.9 Les limitacions* ***biomèdiques diferenciadores*** *que no tenen una relació causal amb el TL no formen part de la caracterització del mateix.*

*2.10 Les limitacions que provenen de causes* ***biomèdiques diferenciadores*** *no formen part de la caracterització del TL, però poden presentar-se de forma concurrent tal com es pot veure en comparar l’infant amb altres que presenten característiques biomèdiques semblants. La clínica ens indica que aquests tipus de concurrències biomèdiques greus amb TL són poc freqüents*

*2.11 La presència de* ***problemes concurrents*** *s’ha de tenir en compte i cal assenyalar-los en el diagnòstic, però no formen part de la caracterització nosològica pròpia del TL, malgrat siguin freqüents.*

*2.12 Els factors de risc*, pel fet de ser circumstancials de cada infant, i no ser causals, no formen part del nucli nosològic del Trastorn del Llenguatge.*

*2.13 Si es considerés d’interès la nosologia descrita en les qüestions anteriors (i en la nota 18), els infants amb problemes greus en el desenvolupament del llenguatge (TDL) es podrien situar en tres grans agrupacions nosològiques:*

*Primera: Diagnòstic biomèdic greu amb Trastorn del Desenvolupament del Llenguatge associat (****X biomèdic + TDL*** *per exemple “Sord profund amb TDL”****)****.*

*Segona: Trastorn del Desenvolupament del Llenguatge amb problemes concurrents (****TDL + X biomèdic lleuger, o funcional*** *per exemple TDL amb otitis recurrents / amb TDAH)*

*Tercera: el problema específic del llenguatge o* ***Trastorn (específic) del Desenvolupament del Llenguatge*** *(****TDL****).*

*2.14 Els* ***factors de risc****, pel fet de ser circumstancials de cada infant, i nos ser causals, no formen part del nucli nosològic del Trastorn del Desenvolupament del Llenguatge. Ara bé, per la seva importància, cal tenir-los sempre en compte en la orientació i en la intervenció.*

*2.15 Els símptomes, tant funcionals com estructurals, dels TDL van canviant amb l’edat des de la infància a l’adolescència i la maduresa. Aquests canvis son d’interès per guiar la intervenció i aprofundir en la nosologia.*

**3. TERMINOLOGIA**

3.*1 L’adjectivació d’”****específic****”cal que es mantingui en la terminologia del diagnòstic del* ***Trastorn del Llenguatge (TEL)****.*

*3.2 L’adjectivació d’”****específic****” es pot mantenir opcionalment, però no cal que sigui necessària en la terminologia del diagnòstic del* ***Trastorn del Llenguatge (TL)****.*

*3.3 L’adjectivació d’”****específic****” no es necessària i no cal incloure-la en la terminologia, seguint la tendència internacional actual. D’aquesta manera, es poden identificar amb més claredat les propietats nosològiques del* ***Trastorn del Desenvolupament del Llenguatge (TDL)****.*

*3.4 La terminologia de* ***“Trastorn del desenvolupament del llenguatge” (TDL)*** *es considera adequada fins als 7 - 8 anys. Si es consolidés el trastorn després de l’aprenentatge inicial, es consideraria com a* ***“Trastorn del llenguatge” (TL)****.*

*3.5 Les* ***subcategoritzacions*** *dins dels Trastorns del Llenguatge son útils en la descripció dels perfils que mostren els infants, però* ***no cal que arribin a formar part del terme*** *del trastorn que es diagnostica.*

*3.6 El terme de* ***Trastorn de la Fonologia (****o de la Parla****)*** *té contingut nosològic i es d’interès que es mantingui independent**del* ***Trastorn del Llenguatge***

*3.7 El terme de* ***Trastorn Pragmàtic*** *té contingut nosològic i és d’interès que es mantingui independent del* ***Trastorn del Llenguatge***

*3.8 Les* ***dificultats pragmàtiques (comunicatives*** *o d’****ús)*** *que puguin presentar els infants amb un TEL o TDL no mereixen un diagnòstic independent. Les que corresponen als infants amb un TEA han de ser considerades, segons la gravetat, com un trastorn principal (biomèdic) o com a concurrent.* .

**4. GESTIÓ DE LES AVALUACIONS DELS INFANTS**

***Qüestions sobre l’avaluació diagnòstica***

*4.1 L’avaluació, la orientació i la programació de la intervenció s’ha de* ***centrar en l’infant*** *i les seves circumstàncies, d’acord amb les dades disponibles, malgrat encara no hi hagi un diagnòstic clar.*

*4.2 Les* ***avaluacions, anamnesis*** *i els* ***informes*** *dels TEL o TDL dels infants, a mes del diagnòstic, haurien d’incorporar dades de diverses fonts que descriguin l’estat funcional i estructural de les habilitats psicolingüístiques dels infants.*

*4.3 En l’avaluació del TEL o TDL a partir de* ***tests de llenguatge,*** *usualment s’empra la diferència d’1.25 desviacions estàndard respecte a la mitjana en dos o més subtest de la prova com a criteri diagnòstic (Tomblin, 2008). Aquest nivell es considera útil i suficient?*

*4.4 L’ús dels tests és recomanable perquè facilita la comparació clínica i la recerca, en especificar edats i nivells de competències on es situa cada infant.*

*4.5 Seria bo consensuar una bateria de tests ben estandarditzada per usar-la com a referència per la identificació del trastorn del llenguatge.*

*4.6 La discrepància entre el* ***nivell no verbal i verbal*** *en els tests d’intel·ligència no sembla sostenir-se com indici inclusiu o exclusiu de diagnòstic per a les dificultats cognitives de suport al llenguatge (Rice, 2016; Bishop 2017).*

*4.7 És poc usual trobar trastorns del llenguatge “purs” en infants abans dels 5 anys; en molts casos hi han dificultats comòrbides en àrees no lingüístiques. En aquests casos seria convenient una avaluació feta per un equip multidisciplinari.*

*4.8 Quan un infant presenti* ***dificultats notòries*** *del llenguatge ha de ser valorat i orientat per un* ***logopeda*** *i examinat per* ***altres especialistes*** *en cas de sospita de comorbiditat i factors de risc.*

*4.9 Els* ***canvis*** *que fan els infants en el curs dels aprenentatges són importants. Per incorporar-los al diagnòstic. La orientació amb les* ***reavaluacions comparatives*** *o* ***dinàmiques*** *amb perfils del llenguatge**són molt clarificadores (Paul, 2000).*

*4.10 La* ***intervenció precoç*** *ajuda a compensar un desenvolupament retardat i pot evitar el trastorn del llenguatge. Per aquest motiu es recomanaria que s’estengui temporalment als casos de risc o de dubte.*

**5. VALORACIÓ DE LES QÜESTIONS DE LA NOSOLOGIA I LA TERMINOLOGIA**

*5.1 El qüestionari sobre nosologia i terminologia que s’ha presentat per consensuar opinions mereix la següent valoració i comentari.*
