# Supplementary material
Source: Elsevier journal article supplement (https://www.sciencedirect.com/science/article/pii/S0214460320301066)
Supplement: mmc2 [file S0214460320301066:mmc2.doc]

ANEXO II

Traducción autorizada de los resultados del DELPHI de:

Visser-Bochane, M., Gerris, E., Schans, P., Reijneveld, S. y Luinger, M. (2017). Atypical speech, Language development: a consensus study on clinical signs in the Netherlands. *International Journal of Communication Disorders, 52*, 10 – 20.
